# Supplementary material
Source: publisher figshare collection journal article supplement (https://sage.figshare.com/ndownloader/files/16840226)
Supplement: Supplementary file 1 [file 16840226]

Supplementary file 3

Table 3. lateral subglossopalatal synechia

| Authors | journal | Year published | single/  multiple | cleft palate | aglossia/  microglossia | micrognathia | limb anomaly | cardiac anomaly | Other head and neck anomalies | other associated anomalies | |
| --- | --- | --- | --- | --- | --- | --- | --- | --- | --- | --- | --- |
| JR Hayward, JK Avery | J Oral Surg | 1957 | single | Y | N | N | N | N |  |  |
| J Berendes | Hals Nasen Ohren Wegseiser | 1961 | multiple | Y | Y | Y | N | N |  |  |
| Scott | Birth Defects | 1971 | multiple | Y | Y | N | Y | N |  |  |
| W. Fuhrmann, F. Koch, W. Schweckendiek | Humangenetik | 1972 | multiple | N | Y | Y | N | N | short upper lip | none |
| Zalzal | Arch otolaryngol Head Neck Surg | 1986 | multiple | N | N | N | Y | N |  | hypospadias, bifid scrotum |
| Bagatin M, Boric V | J Oral Maxillofac Surg | 1990 | single | N | N | N | N | N | none | none |
|  |  |  | multiple | Y | N | N | N | N | bilateral incomplete cleft lip | none |
| Nancy MK Nakata | Am J med Genetics | 1993 | multiple | N | N | N | N | N | grooved and hypoplastic uvula, full lower lip, microcephaly, triangular face, malar hypoplasia, retrogenia, upslant palpebral fissures, low set and prominent ears | short stature |
|  |  |  | multiple | Y | N | N | N | N | triangular face, retrogenia, full lower lip, prominent ears, long slant palpeble fissure |  |
|  |  |  | multiple | Y | N | N | N | N | full lower lip, microcephaly, long and upslant palpebral fissures, prominent ears with abnormal antihelix |  |
| LR David | Eur J Plast Surg | 1995 | multiple | Y | N | N | N | N | wide unilateral cleft lip, alveolus | none |
|  |  |  | multiple | Y | N | N | N | N |  | none |
| E Denion | Cleft Palate Craniofac | 2002 | multiple | Y | N | N | N | N | pierre Robin sequence, lower lip hypotonia |  |
| Haydar SG, Tercan A, Uckan S | J clin Pediatr Dent | 2003 | multiple | N | N | N | N | N | none | none |
| SK Donepudi, RM Stocks | Int J Pediatr Otorhinolaryngol | 2009 | multiple | Y | N | N | N | N |  | none |
|  |  |  | multiple | Y | N | N | N | N |  | N/A |
| D Sybil, A Saktani | Natl J Maxillofac Surg | 2013 | single | Y | N | N | N | N |  | none |
| AR Buche | Int J Red Trends S C Technol | 2014 | multiple | N | N | N | N | Y |  |  |
| Jash PK, Chattopadhyay D, Rampuri V, | J Cleft Lip Palate Craniofac Anomal | 2015 | multiple | Y | N | N | N | N |  | none |
| MA Mascarella, J Schwartz | Int J Pediatr Otorhinolaryngol | 2015 | multiple | Y | N | Y | N | N | enlarged base of tongue | none |
|  |  | 2015 | multiple | Y | N | N | N | N |  | none |
| S Naidoo, KW Bütow | Ann Maxillofac Surg | 2015 | diffuse | Y | N | Y | N | N |  | N/A |
|  |  | 2015 | single | Y | N | N | N | N |  | N/A |
| A Dongol, P Acharya, JN Prasad | J Oral Maxillofac Surg | 2016 | multiple | Y | N | N | N | Y |  |  |
|  |  | 2016 | multiple | Y | N | N | N | N |  | none |
| XQ Wang, WF Zhang, YG Wang | J Craniofac Surg | 2016 | multiple | Y | N | N | N | Y |  | funnel chest |

References

Bagatin M, Borić V. Congenital intraoral epithelial bands: report of two cases. *Journal of oral and maxillofacial surgery: official journal of the American Association of Oral and Maxillofacial Surgeons.* 1990;48(3):309-310.

Berendes J. Angeborene Synechie zwischen der Mundbodenschleimhaut und den Oberkieferfortsätzen am Rande einer Gaumenspalte. *HNO.* 1961;9:180.

Buche A, Borade V, Suman N, Chintale S, Jaiswal S. Congenital oral synechiae. A case report and review. *Int J Rec Trends Sc Technol.* 2014;10:184-186.

David L, DeFranzo A, Argenta L. Oral synechiae—unusual initial asymptomatic presentation of four cases. *European Journal of Plastic Surgery.* 1995;18(5):255-257.

Denion E, Capon N, Martinot V, Pellerin P. Neonatal permanent jaw constriction because of oral synechiae and Pierre Robin sequence in a child with van der Woude syndrome. *Cleft Palate Craniofac J.* Jan 2002;39(1):115-119.

Donepudi SK, Stocks RM, Pivnick EK, Mineck C, Thompson JW. Cleft palate lateral synechia syndrome: an opportunity for unique surgical closure. *Int J Pediatr Otorhinolaryngol.* Jun 2009;73(6):861-866.

Dongol A, Acharya P, Prasad J, Jaisani M. A veil in the oral cavity: report of two cases of oral synechiae. *International journal of oral and maxillofacial surgery.* 2017;46(3):286-288.

Fuhrmann W, Koch F, Schweckendiek W. Autosomal dominante vererbung von gaumenspalte und synechien zwischen gaumen und mundboden oder zunge. *Humangenetik.* 1972;14(3):196-203.

Haydar SG, Tercan A, Uckan S, Gurakan B. Congenital gum synechiae as an isolated anomaly: a case report. *J Clin Pediatr Dent.* Fall 2003;28(1):81-83.

Hayward JR, Avery JK. A variation in cleft palate. *J Oral Surg (Chic).* Oct 1957;15(4):320-324.

Jash PK, Chattopadhyay D, Rampuri V, Ahmed F. Cleft palate with lateral oral synechiae presenting in late childhood: An extreme rarity. *Journal of Cleft Lip Palate and Craniofacial Anomalies.* 2015;2(2):133.

Mascarella MA, Schwartz J, Manoukian JJ. Congenital intra-oral adhesions: a surgical approach to cleft palate lateral synechia syndrome. *Int J Pediatr Otorhinolaryngol.* May 2015;79(5):769-772.

Naidoo S, Butow KW. Nonsyndromic palate Synechia with floor of mouth. *Ann Maxillofac Surg.* Jan-Jun 2015;5(1):100-103.

Nakata NM, Guion-Almeida ML, Richieri-Costa A. Cleft palate-lateral synechiae syndrome: report on three new patients with additional findings and evidence for variability and heterogeneity. *Am J Med Genet.* Sep 1 1993;47(3):330-332.

Scott CI, Jr. Aglossia-adactylia syndrome. *Birth Defects Orig Artic Ser.* Jun 1971;7(7):281.

Sybil D, Sagtani A. Cleft palate lateral synechia syndrome. *Natl J Maxillofac Surg.* Jan 2013;4(1):87-89.

Wang X-Q, Zhang W-F, Wang Y-G, Bu L-L, Hou M. Syngnathia Between the Palate and Mouth Floor, Cleft Palate, and Funnel Chest. *Journal of Craniofacial Surgery.* 2016;27(8):e762-e763.

Zalzal GH, Bratcher GO, Cotton RT. Subglossopalatal membrane. *Archives of Otolaryngology–Head & Neck Surgery.* 1986;112(10):1101-1103.
